# Supplementary material for: Seasonal Pollinosis Due to Kans Grass Pollen: Prevalence and Immune-Biochemical Approach
Source: MDPI journal article supplement (doi:10.3390/aerobiology1010004), 2023-09-20
Supplement: s1 [file s1]

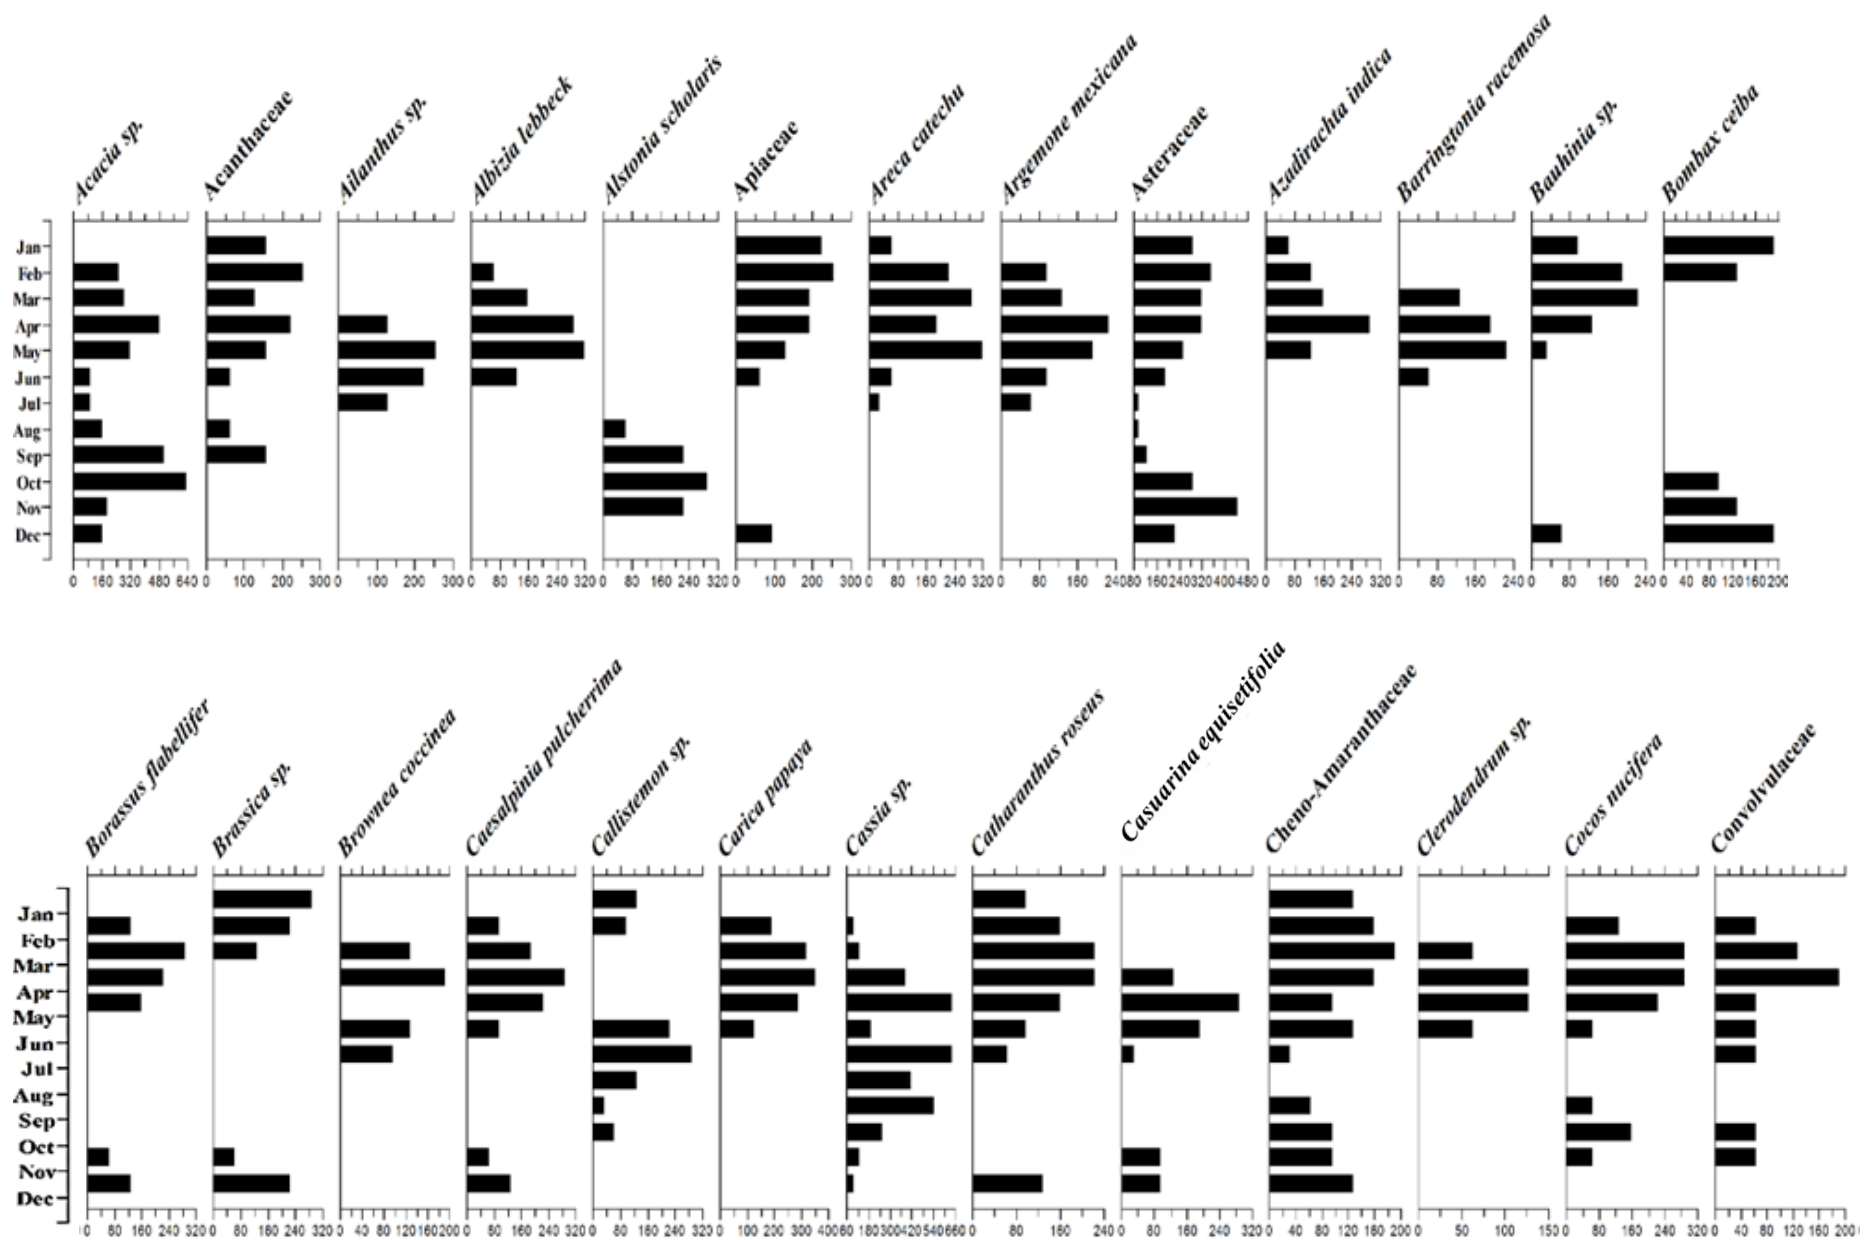

Figure S 1: A comprehensive pollen calendar of Santiniketan representing 63 pollen types

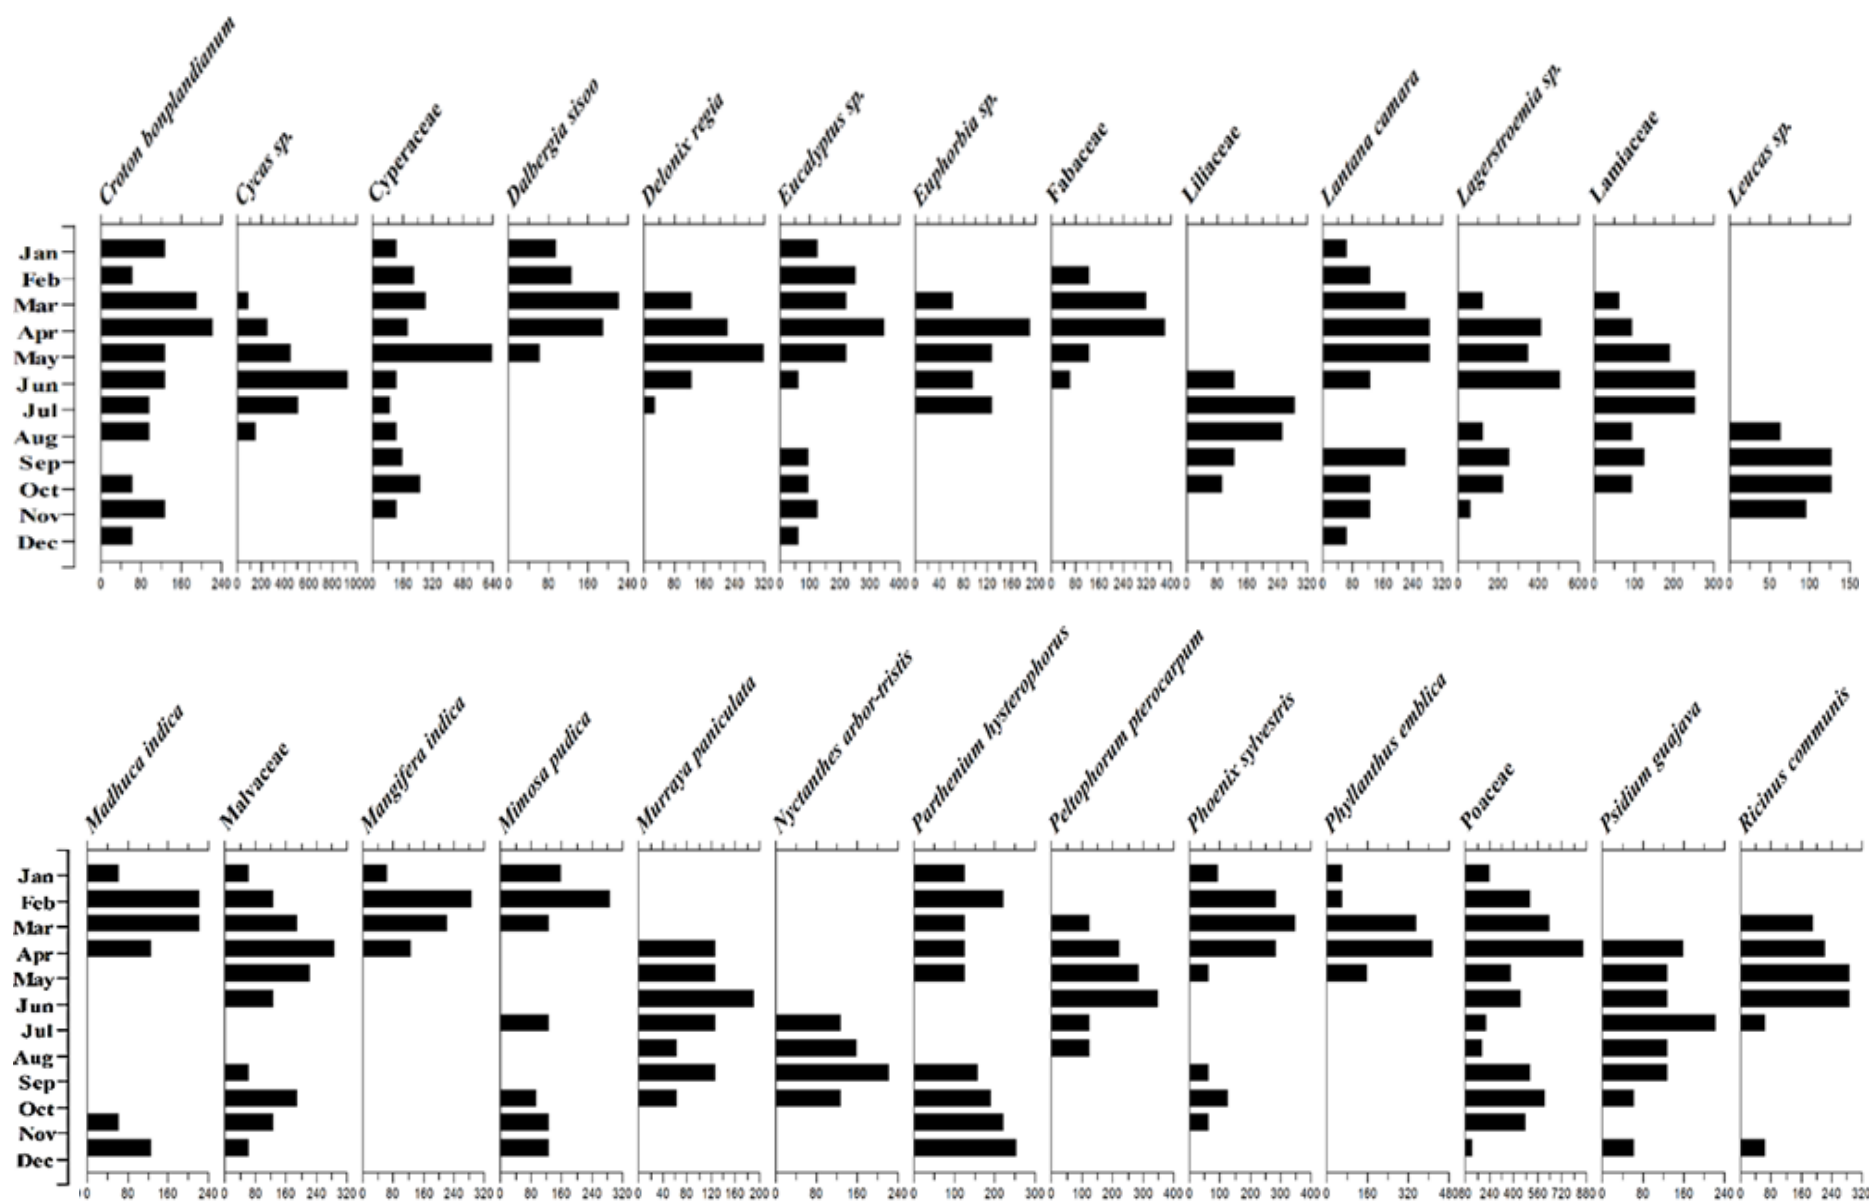

Figure S 1 (contd.): A comprehensive pollen calendar of Santiniketan representing 63 pollen types

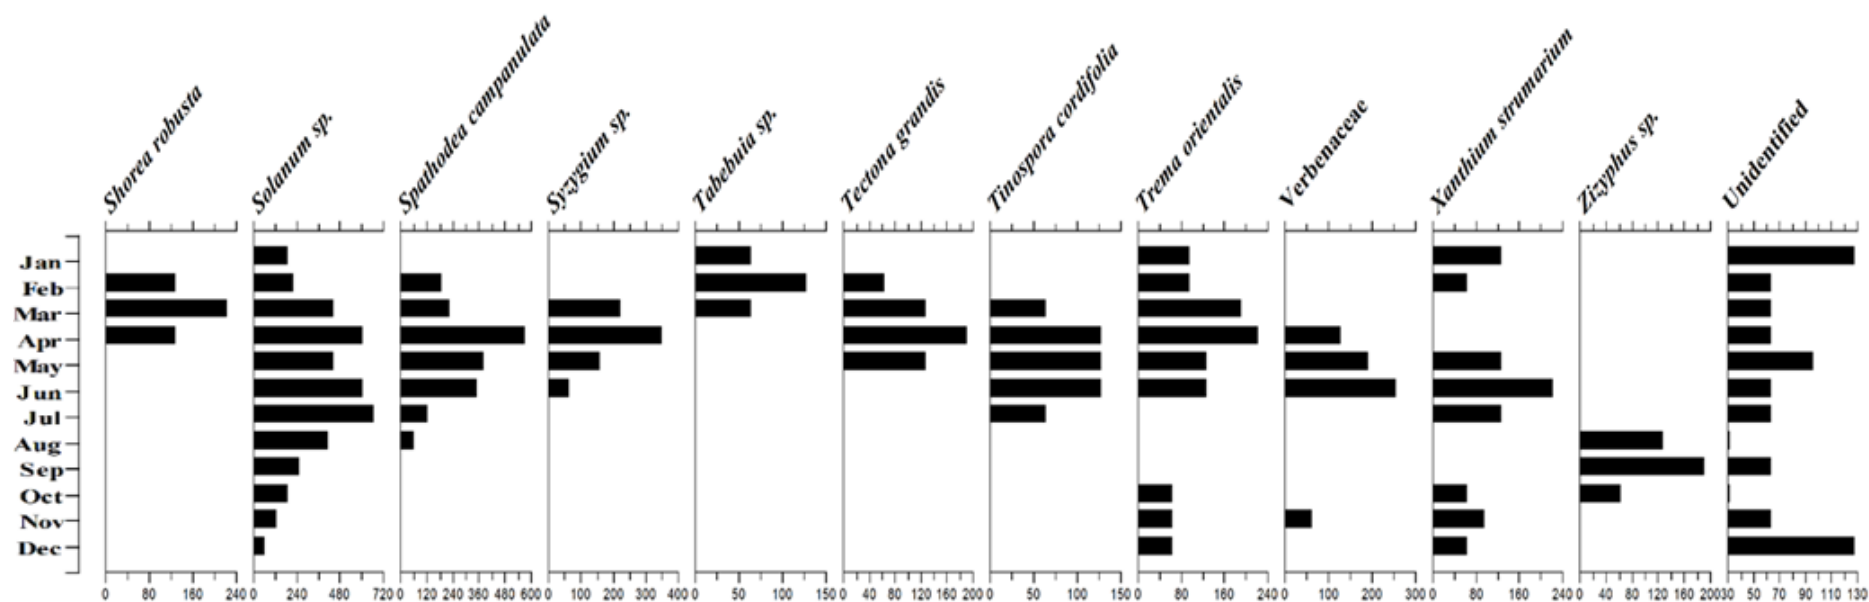

**Figure S 1 (contd.):** A comprehensive pollen calendar of Santiniketan representing 63 pollen types

| Types of pollen                   | Jan | Feb | Mar | Apr | May | Jun | Jul | Aug | Sep | Oct | Nov | Dec |
|-----------------------------------|-----|-----|-----|-----|-----|-----|-----|-----|-----|-----|-----|-----|
| <i>Saccharum spontaneum</i> (SS)  |     |     |     |     |     |     |     |     |     |     |     |     |
| <i>Cynodon dactylon</i> (Cd)      |     |     |     |     |     |     |     |     |     |     |     |     |
| <i>Chloris barbata</i> (Cb)       |     |     |     |     |     |     |     |     |     |     |     |     |
| <i>Digitaria ciliaris</i> (Dc)    |     |     |     |     |     |     |     |     |     |     |     |     |
| <i>Eragrostis tenella</i> (Et)    |     |     |     |     |     |     |     |     |     |     |     |     |
| <i>Oryza sativa</i> (Os)          |     |     |     |     |     |     |     |     |     |     |     |     |
| <i>Imperata cylindrica</i> (Ic)   |     |     |     |     |     |     |     |     |     |     |     |     |
| <i>Saccharum officinarum</i> (So) |     |     |     |     |     |     |     |     |     |     |     |     |
| <i>Zea mays</i> (Zm)              |     |     |     |     |     |     |     |     |     |     |     |     |

Figure S 2: Flowering phenology of nine identified grasses growing around the study area

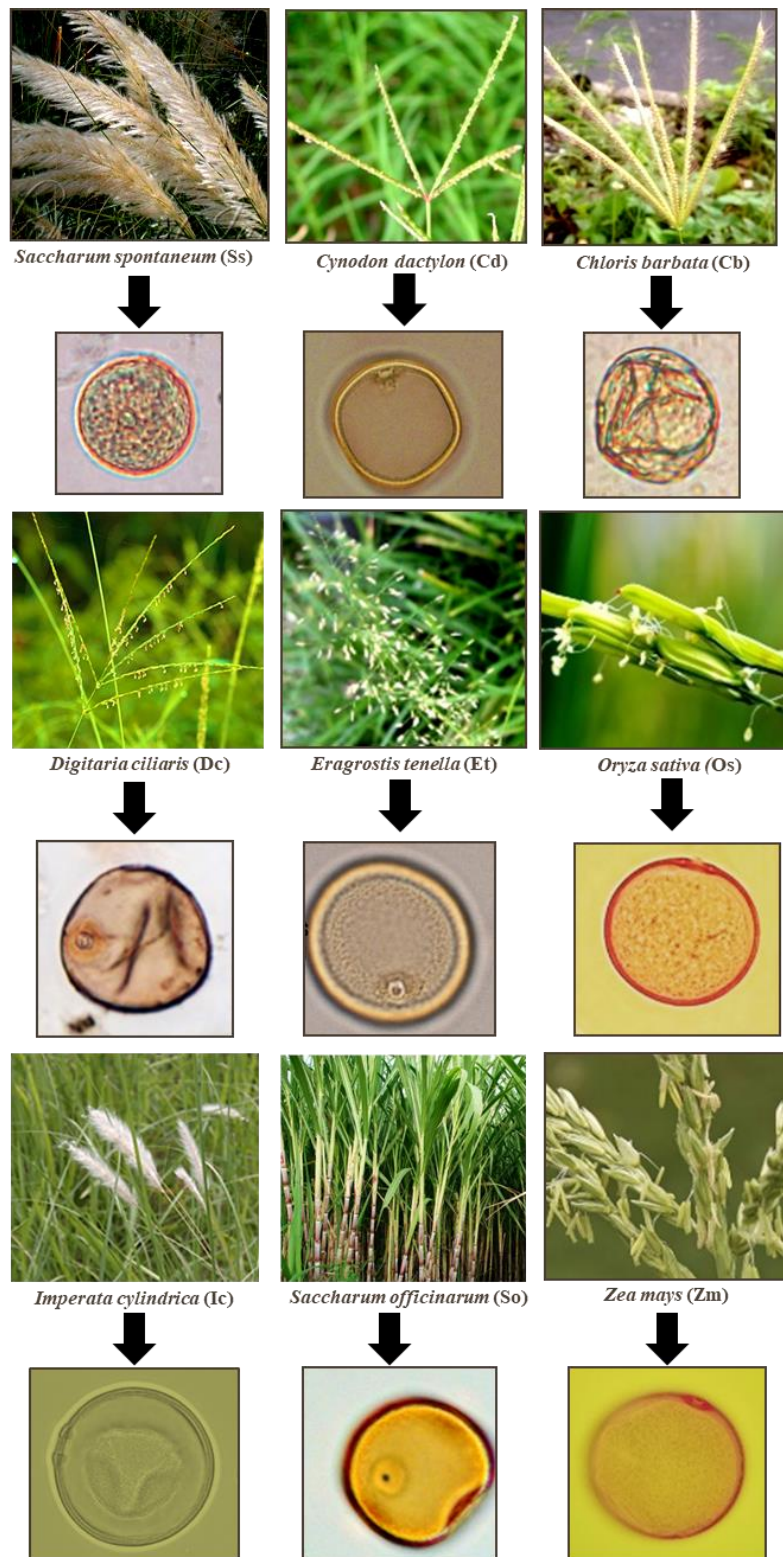

Figure S 3 : Pollen morphology of nine grasses under this investigation
